# Supplementary material
Source: Royal Society of Chemistry journal article supplement (doi:10.1039/d6ce00087h)
Supplement: d6ce00087h2.pdf [file d6ce00087h2.pdf]

## Supporting Information

### Encapsulation of Cation in Sulphate and Anion in Methyl Sulphate Salt of Sulphathiazole

Abhinav Hazarika, Abhay Pratap Singh, and Jubaraj B. Baruah\*

#### Table of contents:

---

|           |                                                                                                                                                                                                           |
|-----------|-----------------------------------------------------------------------------------------------------------------------------------------------------------------------------------------------------------|
| Figure S1 | <sup>1</sup> HNMR (400 MHz, DMSO-d <sup>6</sup> ) spectra of the sulphate salt of sulphathiazole (broad peak is from water in solvent).                                                                   |
| Figure S2 | <sup>1</sup> HNMR (600 MHz, DMSO-d <sup>6</sup> ) spectra of methyl sulphate salt of sulphathiazole (broad peak is from water in solvent).                                                                |
| Figure S3 | (a) Experimental and (b) Simulated from crystallographic information file of the (i) sulphate salt and (ii) methylsulphate salt of Sulphathiazole                                                         |
| Figure S4 | FTIR spectra of (a) sulphathiazole, and (b) (HSTZ) <sub>2</sub> (SO <sub>4</sub> ) (Left-side) and on the right side are the expanded regions 1800 cm <sup>-1</sup> to 450 cm <sup>-1</sup> .             |
| Figure S5 | FTIR Spectra of (a) (HSTZ)(MeOSO <sub>3</sub> ), and (b) (HSTZ) <sub>2</sub> (SO <sub>4</sub> ) (Left-side) and the expanded region 1800 cm <sup>-1</sup> to 450 cm <sup>-1</sup> (right side).           |
| Figure S6 | (i) Hirshfeld surface and (ii) Fingerprint plot of the sulphate salt                                                                                                                                      |
| Figure S7 | (i) Hirshfeld surface and (ii) Fingerprint plot of the methyl sulphate salt                                                                                                                               |
| Figure S8 | The difference in energy between the sum of energy of neutral components as compared to the energy of methyl-sulphate salt of sulphathiazole and cocrystal of sulphathiazole with methylsulphonic acid. . |
| Table S1  | Hydrogen-bond parameters of the sulphate salt                                                                                                                                                             |
| Table S2  | Hydrogen-bond parameters of the methyl sulphate salt                                                                                                                                                      |

---



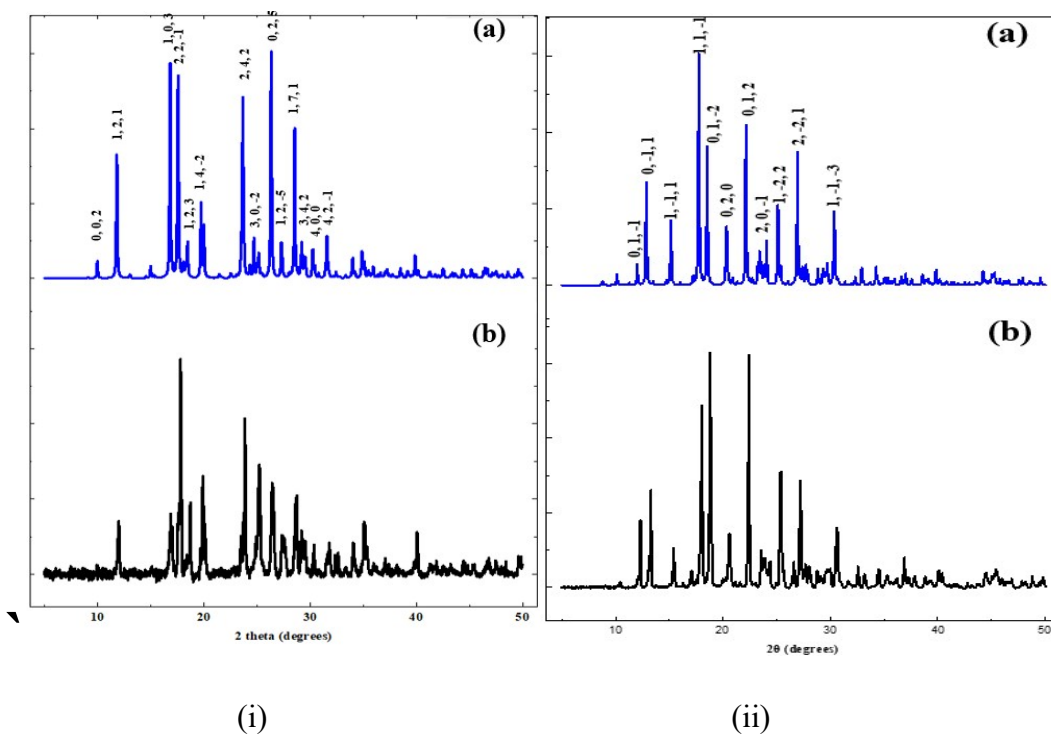

Figure S3: (a) Experimental and (b) Simulated from crystallographic information file of the (i) sulphate salt and (ii) methylsulphate salt of Sulphathiazole

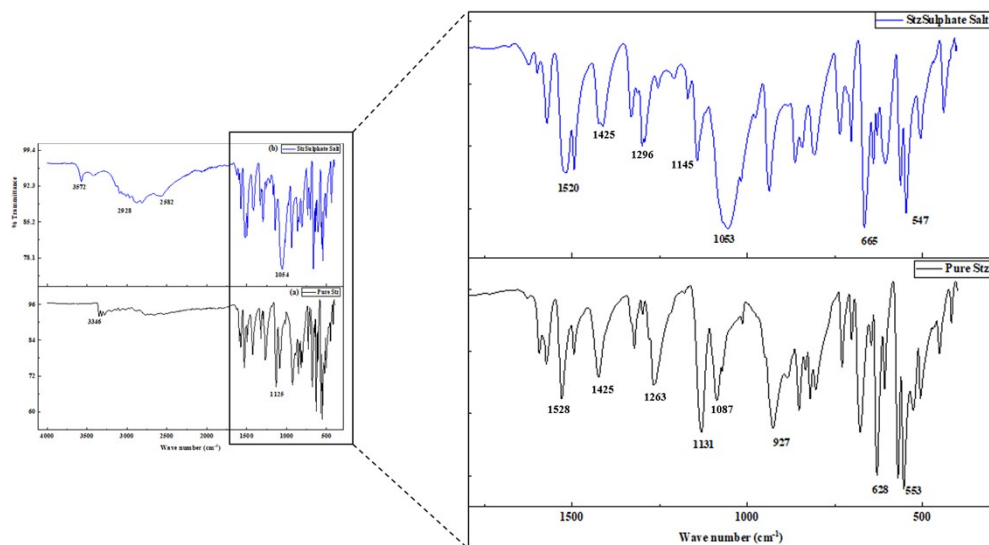

Figure S4: FTIR spectra of (a) sulphathiazole, and (b) (HSTZ)<sub>2</sub>(SO<sub>4</sub>) (Left-side), and on the right side are the expanded regions 1800 cm<sup>-1</sup> to 450 cm<sup>-1</sup>.

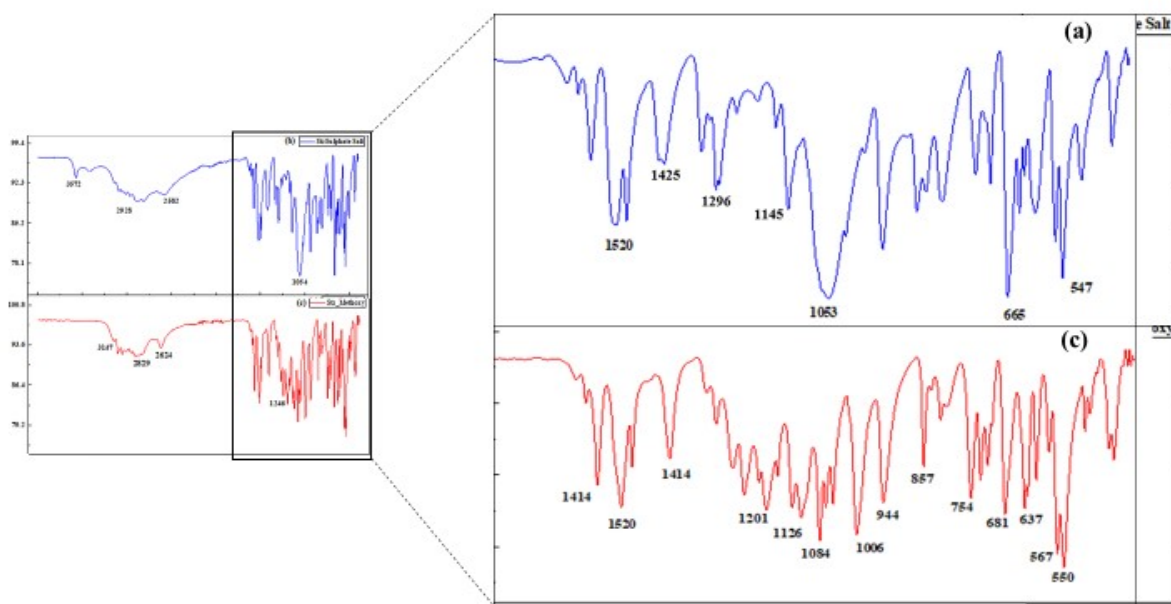

Figure S5: FTIR Spectra of (a)  $(\text{HSTZ})(\text{MeOSO}_3)$ , and (b)  $(\text{HSTZ})_2(\text{SO}_4)$ , (Left-side) and the expanded region  $1800\text{ cm}^{-1}$  to  $450\text{ cm}^{-1}$  (right side).

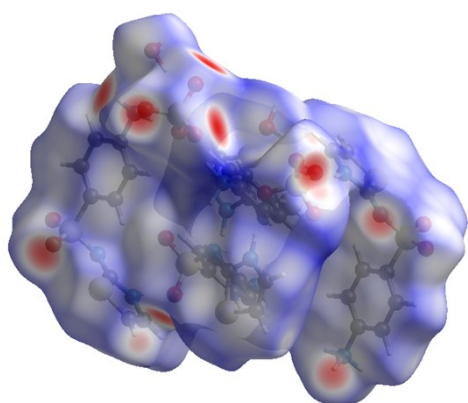

(i)

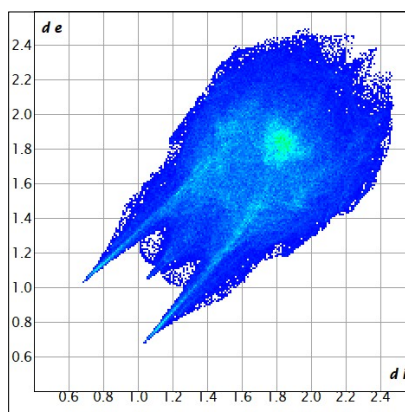

(ii)

Figure S6 : (i) Hirshfeld surface, (ii) Fingerprint plot of the sulphate salt.

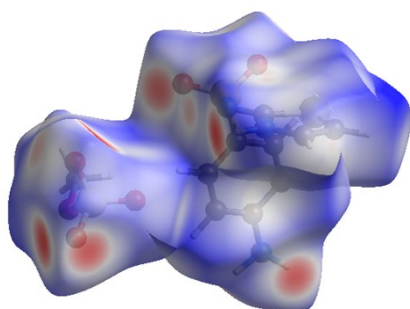

(i)

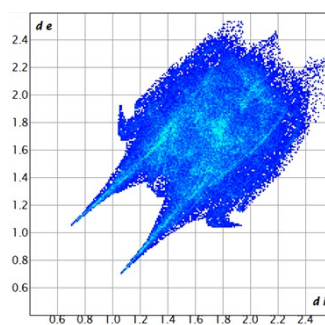

(ii)

Figure S7 : (i) Hirshfeld surface and (ii) Fingerprint plot of the methyl sulphate salt

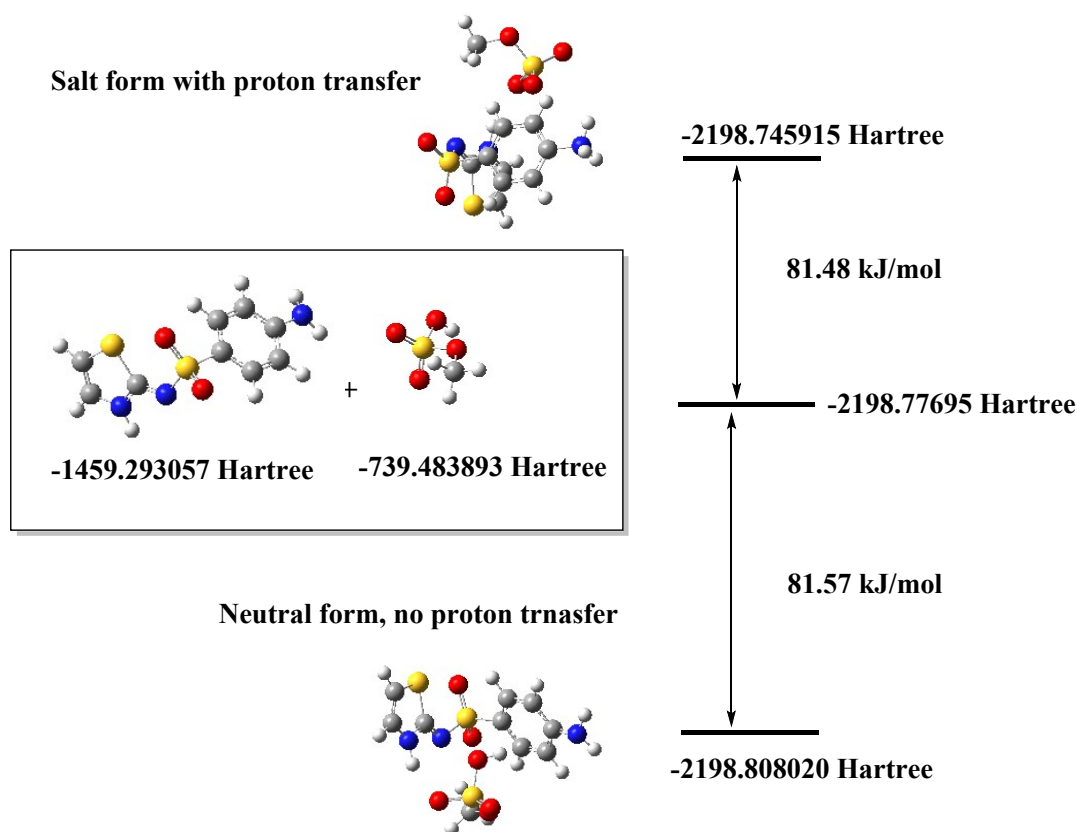

Figure S8: The difference in energy between the sum of energy of neutral components as compared to the energy of methyl-sulphate salt of sulphathiazole and cocrystal of sulphathiazole with methylsulphonic acid.

Table S1: Hydrogen-bond parameters of the sulphate salt

| D-H...A        | D-H (Å) | H...A (Å) | D...A (Å) | $\angle$ D-H...A (°) |
|----------------|---------|-----------|-----------|----------------------|
| N1-H1...O5     | 0.87    | 1.87      | 2.7212(1) | 165                  |
| N3-H3A...O8    | 0.89    | 1.90      | 2.7862(1) | 179                  |
| N3-H3B...N11   | 0.89    | 2.18      | 2.9971(1) | 153                  |
| N3-H3C...O12   | 0.89    | 1.87      | 2.7363(1) | 163                  |
| N4-H4...O14    | 0.86    | 1.94      | 2.8918(1) | 175                  |
| N6-H6A...O11   | 0.89    | 1.93      | 2.8183(1) | 178                  |
| N6-H6A...O12   | 0.89    | 2.52      | 3.0508(1) | 119                  |
| N6-H6B...O7    | 0.89    | 1.96      | 2.7613(1) | 149                  |
| N6-H6C...N8    | 0.89    | 2.13      | 2.9141(1) | 147                  |
| N7-H7...O7     | 0.78    | 2.02      | 2.7974(1) | 178                  |
| N9-H9A...O6    | 0.89    | 2.48      | 3.0582(1) | 123                  |
| N9-H9A...O8    | 0.89    | 1.96      | 2.8483(1) | 173                  |
| N9-H9B...N5    | 0.89    | 2.16      | 2.9256(1) | 144                  |
| N9-H9C...O14   | 0.89    | 1.96      | 2.7833(1) | 153                  |
| N10-H10...O13  | 0.87    | 1.85      | 2.7092(1) | 169                  |
| N12-H12A...O11 | 0.89    | 1.91      | 2.8023(1) | 177                  |
| N12-H12B...O6  | 0.89    | 1.87      | 2.7237(1) | 161                  |
| N12-H12C...N2  | 0.89    | 2.18      | 2.9953(1) | 151                  |
| O17-H17A...O16 | 0.85    | 2.02      | 2.8649(1) | 173                  |
| O17-H17B...O5  | 0.85    | 2.24      | 2.9551(1) | 141                  |
| O18-H18A...O9  | 0.85    | 1.96      | 2.8058(1) | 173                  |
| O18-H18B...O13 | 0.85    | 2.17      | 2.8711(1) | 139                  |

Table S2: Hydrogen-bond parameters of the methyl sulphate salt

| D-H...A     | D-H (Å) | H...A (Å) | D...A (Å) | ∠D-H...A (°) |
|-------------|---------|-----------|-----------|--------------|
| N1-H1A...O1 | 0.89    | 2.13      | 2.9448(3) | 152          |
| N1-H1A...O1 | 0.89    | 2.31      | 2.9284(3) | 126          |
| N1-H1B...O4 | 0.89    | 1.88      | 2.7546(3) | 169          |
| N1-H1C...N2 | 0.89    | 2.45      | 3.0564(3) | 121          |
| N1-H1C...O5 | 0.89    | 2.14      | 2.9991(3) | 144          |
| N3-H3...O5  | 0.84    | 1.99      | 2.8185(3) | 168          |
| C5-H5...O2  | 0.93    | 2.55      | 3.4776(3) | 176          |
